# Supplementary material for: Transplantation of adipose-derived stem cells overexpressing inducible nitric oxide synthase ameliorates diabetes mellitus-induced erectile dysfunction in rats
Source: PeerJ. 2019 Aug 12;7:e7507. doi: 10.7717/peerj.7507 (PMC6694783; doi:10.7717/peerj.7507)
Supplement: Supplemental Information 1 — Raw data of iNOS mRNA expression for Fig. 2D, NO concentration in supernatant for Fig. 3A, protein expression after co-culture for Figs. 3C–3E, rats’ metabolic variables for Table 1, ICP to MAP ratio for Fig. 4B, NO concentration in penile tissues for Fig. 4C, cGMP concentration in penile tissues for Fig. 4D, and collagen to smooth muscle ratio in penile tissues for Fig. 4J. [file peerj-07-7507-s001.xlsx]

## Sheet: iNOS mRNA expression
	1d			3d			5d			7d			10d			14d
	ADSCs	ADSCs-EGFP	ADSCs-iNOS	ADSCs	ADSCs-EGFP	ADSCs-iNOS	ADSCs	ADSCs-EGFP	ADSCs-iNOS	ADSCs	ADSCs-EGFP	ADSCs-iNOS	ADSCs	ADSCs-EGFP	ADSCs-iNOS	ADSCs	ADSCs-EGFP	ADSCs-iNOS
	1.09619	1.16675	4131.64	1.61664	0.952638	18690.3	0.993092	0.805245	23170.5	1.01669	0.952638	81810.6	1.06437	0.925516	69272.7	0.861546	0.984675	1541.37
	1.08862	1.11149	3963.34	0.689203	1.09429	25942	1.02101	1.49226	19619.5	0.968365	1.09429	83529.6	1.09429	1.10063	69754.6	1.21419	0.955945	2120.22
	0.71326	0.759173	4039.61	0.896888	1.04247	18820.3	1.04608	0.794159	22851.5	1.0855	1.04247	77397.5	0.858565	1.06314	66450.8	0.993092	1.04608	2418.67

## Sheet: NO in cells
	1d			3d			5d			7d			10d			14d
	ADSCs	ADSCs-EGFP	ADSCs-iNOS	ADSCs	ADSCs-EGFP	ADSCs-iNOS	ADSCs	ADSCs-EGFP	ADSCs-iNOS	ADSCs	ADSCs-EGFP	ADSCs-iNOS	ADSCs	ADSCs-EGFP	ADSCs-iNOS	ADSCs	ADSCs-EGFP	ADSCs-iNOS
μmol/L	19.458	12.243	31.483	16.517	12.515	41.103	20.519	20.519	103.633	27.303	27.303	129.735	20.647	17.991	64.551	28.943	26.615	30.524
	17.053	19.458	12.243	26.522	16.517	36.293	18.518	14.516	94.013	22.647	22.647	127.407	24.631	17.991	59.895	17.303	28.943	30.524
	14.648	20.519	31.483	18.518	22.524	36.293	20.519	14.516	96.418	24.975	27.303	162.327	17.991	11.007	62.223	19.631	14.975	31.959

## Sheet: cell culture protein expression
	CCSMCs	+	+	+	+	+
	30mM glucose	-	+	+	+	+
	ADSCs	-	-	+	-	-
	ADSCs-EGFP	-	-	-	+	-
	ADSCs-iNOS	-	-	-	-	+
	TGF-β1	0.348943	0.816217	0.563206	0.545582	0.392119
		0.316804	0.808052	0.549173	0.476525	0.320507
		0.469658	0.806369	0.424601	0.382276	0.323205
	collagen1	0.284419	0.492503	0.400501	0.370738	0.219315
		0.393722	0.626138	0.379003	0.348582	0.197517
		0.39705	0.563125	0.285679	0.283297	0.210725
	collagen4	0.109125	0.270706	0.100509	0.115389	0.0814749
		0.119233	0.295009	0.135663	0.153507	0.0729944
		0.127968	0.279597	0.168602	0.141258	0.0483124

## Sheet: Metabolic  variables
	Initial weight (g)	control	DMED	ADSCs	ADSCs-EGFP	ADSCs-iNOS		Final weight (g)	control	DMED	ADSCs	ADSCs-EGFP	ADSCs-iNOS
		266	273	275	290	254			490	280	251	287	290
		254	276	280	265	263			655	252	257	265	270
		279	264	263	251	273			647	265	285	280	276
		284	266	254	264	276			630	265	296	310	287
		246	269	265	258	258			570	280	305	255	254
		275	249	270	271	267			604	255	271	294	280
		267	276	270	251	288			612	310	306	268	287
		273	273	270	269	273			560	290	305	280	302
		268	274	268	280	284			595	276	286	297	320
	Initial fasting glucose (mmol/L)	control	DMED	ADSCs	ADSCs-EGFP	ADSCs-iNOS		Final fasting glucose (mmol/L)	control	DMED	ADSCs	ADSCs-EGFP	ADSCs-iNOS
		5.6	5.8	6.5	5.5	6.9			6.1	31.5	28.3	31.2	28.6
		5.9	6.3	6.1	5.7	5.5			6.7	29.6	27.8	30.8	33.1
		5.8	6.4	5.8	6.4	6			5.9	27.1	30.1	30.8	32.6
		7	6.2	6.4	6.8	6			6.2	33	26.8	28.4	26.3
		6.7	5.6	6.8	6.1	6.3			6.4	31.6	28.8	30.2	33.2
		6.5	6.4	6.7	6	6.2			5.8	32.6	30.9	28.9	28.4
		6.7	6.7	6.4	7	6.3			6	31.7	29.1	33.6	26.2
		5.8	6.4	5.9	6.8	6.3			6.2	28.4	33.4	28.7	31.5
		6.3	6.1	5.5	5.9	6.5			6.3	31.8	30.1	30.3	29.9
	mean arterial pressure(mmHg)	control	DMED	ADSCs	ADSCs-EGFP	ADSCs-iNOS
		107	109.3	100.7	103.7	112
		101.3	93.3	106.7	119.3	106.3
		106.7	97.3	116	100	98.7
		98.7	102.3	104	95	106
		104	104.3	97.7	104.7	101.7
		108.3	112.3	109.3	102.3	105
		95.7	113.7	100	103.3	113.3
		113.3	114	111.7	97	115
		105.1	99	104.7	92.7	117.7

## Sheet: ICP to MAP ratio
	2.5v							5.0v
	control	DMED	ADSCs	ADSCs-EGFP	ADSCs-iNOS			control	DMED	ADSCs	ADSCs-EGFP	ADSCs-iNOS
	0.55	0.21	0.38	0.36	0.57			0.66	0.24	0.39	0.51	0.63
	0.53	0.2	0.31	0.34	0.53			0.57	0.35	0.38	0.53	0.58
	0.58	0.25	0.39	0.47	0.54			0.47	0.22	0.46	0.38	0.5
	0.54	0.27	0.39	0.41	0.54			0.68	0.35	0.35	0.53	0.61
	0.44	0.3	0.43	0.31	0.371			0.65	0.3	0.35	0.46	0.51
	0.42	0.32	0.48	0.34	0.47			0.71	0.24	0.57	0.43	0.53
	0.5	0.33	0.35	0.36	0.43			0.55	0.36	0.34	0.37	0.64
	0.49	0.3	0.38	0.39	0.47			0.54	0.31	0.55	0.53	0.63
	0.51	0.24	0.39	0.39	0.38			0.62	0.24	0.43	0.44	0.63

## Sheet: NO in tissues
	control	DMED	ADSCs	ADSCs-EGFP	ADSCs-iNOS
μmol/L	5.57874	2.6265	3.76854	4.0055	4.6053
	5.42415	2.58764	3.53605	3.95114	4.58496
	5.40483	2.52936	3.49177	3.62496	4.62564
	5.43474	2.31203	3.3078	3.55646	4.82945

## Sheet: cGMP in tissues
	control	DMED	ADSCs	ADSCs-EGFP	ADSCs-iNOS
μmol/mg protein	7.40107	2.51824	3.97978	4.16677	8.47925
	11.6446	2.356	3.69203	4.16677	7.44632
	12.6712	3.16717	4.18906	5.42434	7.44632
	10.481	1.59891	4.45066	4.31337	7.30859

## Sheet: Masson trichrome staining
	control	DMED	ADSCs	ADSCs-EGFP	ADSCs-iNOS
	8.17003	12.8851	10.9337	11.0239	8.9071
	8.77525	12.7124	10.1116	11.0598	8.77991
	6.9413	15.7998	11.3582	10.3341	7.78663
	7.22596	12.7427	11.0728	10.2654	8.31463
	7.15144	13.3505	10.0858	10.3243	9.33033
